# Supplementary material
Source: Frontiers journal article supplement (https://www.frontiersin.org/articles/286903)
Supplement: Image_7.PDF [file Image_7.PDF]

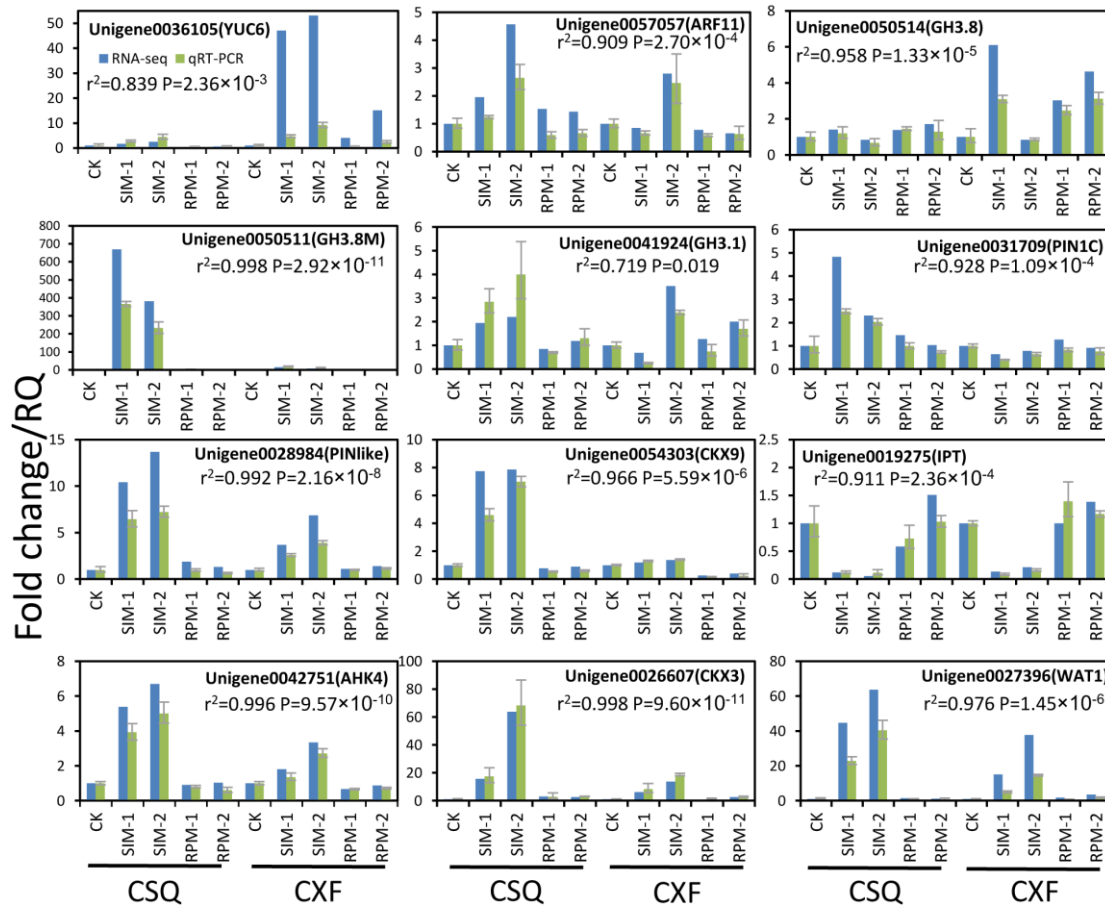

**FIGURE S7 Validation of RNA-seq profiles by qRT-PCR.** Fold change for RNA-seq refers to the ratios of RPKM values of SIM-1 (SIM-2, RPM-2 and RPM-2) to CK for selected transcripts, while relative quantification (RQ) value for qRT-PCR were normalized to expression level of CK. Correlation coefficient between qRT-PCR and RNA-seq were calculated and their associated P-values (P) were provided.
